# Supplementary material for: The effect of calcium–magnesium mixtures in sol–gel coatings on bone tissue regeneration
Source: Royal Society of Chemistry journal article supplement (doi:10.1039/d2bm00742h), 2022-01-01
Supplement: d2bm00742h2.pdf [file d2bm00742h2.pdf]

**Supplementary Table 1.** Targets studied in MC3T3-E1 osteoblasts and RAW264.7 macrophages.

| Name                                                    | Accession    | Sequence                                           | Product length |
|---------------------------------------------------------|--------------|----------------------------------------------------|----------------|
| GADPH ( <i>GADPH</i> )                                  | XM_017321385 | F: TGCCCCCATGTTTGTGATG<br>R: TGGTGGTGCAGGATGCATT   | 83             |
| Osterix ( <i>OSX/SP7</i> )                              | XM_006520519 | F: ACTCATCCCTATGGCTCGTG<br>R: GGTAGGGAGCTGGGTTAAGG | 238            |
| Alkaline Phosphatase ( <i>ALP</i> )                     | XM_006538499 | F: CGGGACTGGTACTCGGATAA<br>R: ATTCCACGTCGGTTCTGTTC | 157            |
| Transforming Growth Factor- $\beta$ ( <i>TGFBETA</i> )  | NM_011577    | F: TTGCTTCAGCTCCACAGAGA<br>R: TGGTTGTAGAGGGCAAGGAC | 183            |
| Runt-related transcription factor 2 ( <i>RUNX2</i> )    | NM_001271631 | F: CCCAGCCACCTTTACCTACA<br>R: TATGGAGTGCTGCTGGTCTG | 150            |
| Interleukin-1 $\beta$ ( <i>IL-1<math>\beta</math></i> ) | NM_008361    | F: GCCCATCCTCTGTGACTCAT<br>R: AGGCCACAGGTATTTTGTCG | 230            |
| Tumor Necrosis Factor- $\alpha$ ( <i>TNFALFA</i> )      | NM_001278601 | F: AGCCCCCAGTCTGTATCCTT<br>R: CTCCTTTGCAGAACTCAGG  | 212            |
| Interleukin-10 ( <i>IL10</i> )                          | XM_036162094 | F: CCAAGCCTTATCGGAAATGA<br>R: TTTCACAGGGGAGAAATCG  | 161            |
