# Supplementary material for: The effect of calcium–magnesium mixtures in sol–gel coatings on bone tissue regeneration
Source: Royal Society of Chemistry journal article supplement (doi:10.1039/d2bm00742h), 2022-01-01
Supplement: d2bm00742h3.pdf [file d2bm00742h3.pdf]

**Supplementary Table 2.** Progenesis comparative analysis between the proteins identified onto the Ca or CaMg materials with respect to the control treatment without ions. Proteins with ANOVA  $p < 0.05$  (yellow) and a ratio higher than 1.5 in either direction were considered as significantly different. Proteins with increased affinity to coatings doped with the ion mixtures in comparison to MT are marked in red, while those with reduced affinity appear in green.

| Accession   | Description                            | Peptides | $p$ value | Ca/<br>MT | $p$ value | Ca0.5Mg/<br>MT | $p$ value | Ca1Mg/<br>MT | $p$ value | Ca1.5Mg/<br>MT |
|-------------|----------------------------------------|----------|-----------|-----------|-----------|----------------|-----------|--------------|-----------|----------------|
| PIGR_HUMAN  | Polymeric immunoglobulin receptor      | 4        | 8,8E-02   | 8,2       | 1,0E-01   | 2,1            | 5,1E-02   | 21,3         | 1,9E-02   | 53,4           |
| CO6_HUMAN   | Complement component C6                | 4        | 2,4E-02   | 5,4       | 9,8E-02   | 3,7            | 2,5E-05   | 13,6         | 9,5E-05   | 9,3            |
| HRG_HUMAN   | Histidine-rich glycoprotein            | 5        | 3,8E-02   | 0,7       | 3,0E-03   | 2,8            | 1,4E-04   | 4,2          | 1,1E-04   | 7,0            |
| APOF_HUMAN  | Apolipoprotein F                       | 3        | 8,1E-06   | 8,3       | 2,4E-05   | 6,4            | 9,9E-05   | 6,8          | 1,6E-05   | 5,7            |
| CLUS_HUMAN  | Clusterin                              | 9        | 1,5E-06   | 5,0       | 2,0E-05   | 3,8            | 4,0E-05   | 4,8          | 3,2E-06   | 5,6            |
| APOL1_HUMAN | Apolipoprotein L1                      | 6        | 3,2E-03   | 3,1       | 3,3E-03   | 2,4            | 9,5E-05   | 3,8          | 1,6E-05   | 5,1            |
| APOA4_HUMAN | Apolipoprotein A-IV                    | 7        | 1,4E-04   | 2,7       | 3,4E-04   | 2,4            | 2,3E-04   | 3,3          | 2,6E-06   | 4,2            |
| HBA_HUMAN   | Hemoglobin subunit alpha               | 4        | 8,9E-03   | 2,3       | 1,7E-01   | 1,6            | 1,4E-02   | 3,0          | 2,8E-03   | 4,1            |
| PIP_HUMAN   | Prolactin-inducible protein            | 2        | 9,9E-01   | 1,0       | 7,0E-01   | 1,5            | 6,0E-01   | 1,3          | 2,3E-02   | 3,4            |
| ZA2G_HUMAN  | Zinc-alpha-2-glycoprotein              | 4        | 2,1E-01   | 2,2       | 1,9E-01   | 2,3            | 4,3E-02   | 3,9          | 5,9E-02   | 2,8            |
| ZPI_HUMAN   | Protein Z-dependent protease inhibitor | 2        | 3,0E-03   | 4,1       | 4,2E-01   | 1,9            | 3,6E-03   | 3,8          | 2,7E-02   | 2,4            |
| CO5_HUMAN   | Complement C5                          | 13       | 7,9E-02   | 3,1       | 1,4E-01   | 2,7            | 4,1E-02   | 4,4          | 1,3E-01   | 2,4            |
| CO4B_HUMAN  | Complement C4-B                        | 22       | 1,1E-02   | 2,4       | 8,3E-03   | 2,6            | 2,5E-03   | 2,4          | 4,7E-03   | 2,3            |
| CO4A_HUMAN  | Complement C4-A                        | 22       | 5,7E-01   | 1,4       | 1,5E-02   | 3,7            | 2,7E-02   | 2,8          | 3,1E-02   | 2,3            |
| LG3BP_HUMAN | Galectin-3-binding protein             | 2        | 5,1E-03   | 3,8       | 2,9E-02   | 2,5            | 7,8E-03   | 3,1          | 3,2E-02   | 2,3            |
| A1AG1_HUMAN | Alpha-1-acid glycoprotein 1            | 4        | 7,7E-02   | 2,0       | 2,2E-01   | 1,6            | 1,2E-02   | 3,1          | 1,1E-01   | 2,1            |

|             |                                              |    |         |     |         |     |         |     |         |     |
|-------------|----------------------------------------------|----|---------|-----|---------|-----|---------|-----|---------|-----|
| DSG1_HUMAN  | Desmoglein-1                                 | 9  | 4,4E-02 | 1,7 | 7,5E-03 | 2,6 | 2,0E-02 | 1,9 | 1,8E-02 | 2,1 |
| FBLN1_HUMAN | Fibulin-1                                    | 4  | 2,5E-02 | 2,2 | 6,4E-01 | 0,7 | 3,3E-02 | 1,7 | 6,0E-02 | 2,1 |
| TSK_HUMAN   | Tsukushin                                    | 2  | 3,3E-02 | 3,5 | 9,8E-01 | 1,0 | 4,7E-01 | 1,4 | 2,9E-01 | 2,1 |
| A1BG_HUMAN  | Alpha-1B-glycoprotein                        | 4  | 3,0E-01 | 1,6 | 2,7E-01 | 1,7 | 2,8E-02 | 3,0 | 1,2E-01 | 2,1 |
| DESP_HUMAN  | Desmoplakin                                  | 18 | 4,5E-02 | 1,8 | 1,6E-01 | 1,7 | 7,6E-01 | 1,1 | 1,1E-01 | 2,0 |
| HABP2_HUMAN | Hyaluronan-binding protein 2                 | 2  | 6,8E-03 | 1,7 | 9,8E-02 | 1,4 | 2,3E-02 | 1,7 | 5,3E-03 | 2,0 |
| ITIH2_HUMAN | Inter-alpha-trypsin inhibitor heavy chain H2 | 9  | 9,4E-02 | 1,9 | 3,8E-01 | 1,4 | 2,2E-02 | 2,7 | 1,3E-01 | 2,0 |
| CO9_HUMAN   | Complement component C9                      | 7  | 1,6E-03 | 1,9 | 5,3E-02 | 1,3 | 4,2E-03 | 1,8 | 3,3E-03 | 1,9 |
| TRFE_HUMAN  | Serotransferrin                              | 31 | 1,3E-02 | 2,1 | 1,1E-01 | 1,5 | 5,0E-03 | 2,4 | 5,4E-02 | 1,7 |
| HEP2_HUMAN  | Heparin cofactor 2                           | 3  | 3,4E-01 | 1,3 | 2,5E-01 | 1,3 | 1,1E-02 | 2,1 | 1,9E-02 | 1,7 |
| VTDB_HUMAN  | Vitamin D-binding protein                    | 9  | 3,4E-02 | 1,7 | 2,1E-01 | 1,4 | 3,7E-03 | 2,4 | 1,4E-01 | 1,7 |
| HPTR_HUMAN  | Haptoglobin-related protein                  | 9  | 2,1E-02 | 1,5 | 2,9E-01 | 1,3 | 4,5E-03 | 1,7 | 7,3E-03 | 1,6 |
| A2MG_HUMAN  | Alpha-2-macroglobulin                        | 28 | 2,3E-02 | 1,6 | 3,1E-01 | 1,3 | 1,2E-02 | 1,8 | 1,9E-02 | 1,6 |
| ALBU_HUMAN  | Serum albumin                                | 43 | 4,2E-02 | 1,7 | 2,0E-01 | 1,5 | 1,3E-02 | 2,1 | 1,1E-01 | 1,6 |
| AACT_HUMAN  | Alpha-1-antichymotrypsin                     | 6  | 2,0E-02 | 1,7 | 2,4E-02 | 1,6 | 2,0E-02 | 1,9 | 6,2E-02 | 1,6 |
| HPT_HUMAN   | Haptoglobin                                  | 10 | 9,5E-02 | 1,7 | 1,1E-01 | 1,5 | 2,2E-02 | 2,1 | 1,6E-01 | 1,6 |
| APOH_HUMAN  | Beta-2-glycoprotein 1                        | 10 | 1,9E-01 | 1,2 | 1,1E-02 | 1,3 | 1,4E-01 | 1,2 | 1,4E-03 | 1,6 |
| CFAH_HUMAN  | Complement factor H                          | 25 | 4,6E-03 | 1,7 | 2,3E-01 | 1,3 | 8,8E-02 | 1,3 | 1,1E-03 | 1,6 |
| APOM_HUMAN  | Apolipoprotein M                             | 3  | 5,5E-02 | 1,5 | 7,5E-01 | 1,1 | 3,0E-01 | 1,2 | 1,4E-03 | 1,5 |
| APOA1_HUMAN | Apolipoprotein A-I                           | 16 | 5,3E-02 | 1,4 | 7,8E-04 | 1,6 | 2,0E-04 | 1,7 | 1,9E-04 | 1,5 |

|             |                                              |    |         |     |         |     |         |     |         |     |
|-------------|----------------------------------------------|----|---------|-----|---------|-----|---------|-----|---------|-----|
| A1AG2_HUMAN | Alpha-1-acid glycoprotein 2                  | 4  | 1,0E-02 | 2,1 | 2,4E-01 | 1,6 | 5,5E-03 | 3,0 | 2,7E-01 | 1,4 |
| IGHM_HUMAN  | Immunoglobulin heavy constant mu             | 11 | 3,8E-04 | 1,5 | 3,5E-01 | 1,2 | 1,9E-02 | 1,2 | 1,4E-02 | 1,4 |
| ITIH1_HUMAN | Inter-alpha-trypsin inhibitor heavy chain H1 | 10 | 2,7E-02 | 1,8 | 3,0E-01 | 1,4 | 9,7E-03 | 2,7 | 3,6E-01 | 1,4 |
| HEMO_HUMAN  | Hemopexin                                    | 9  | 9,6E-03 | 1,8 | 6,1E-01 | 1,1 | 3,7E-02 | 1,6 | 1,7E-01 | 1,4 |
| F13B_HUMAN  | Coagulation factor XIII B chain              | 7  | 5,0E-02 | 1,5 | 1,9E-02 | 1,8 | 1,1E-02 | 1,7 | 1,1E-01 | 1,3 |
| IC1_HUMAN   | Plasma protease C1 inhibitor                 | 7  | 2,1E-02 | 1,7 | 2,5E-01 | 1,2 | 1,2E-01 | 1,3 | 2,1E-01 | 1,3 |
| ENOA_HUMAN  | Alpha-enolase                                | 3  | 3,7E-02 | 0,4 | 3,4E-01 | 0,6 | 2,2E-01 | 0,6 | 7,1E-01 | 1,3 |
| IGHG4_HUMAN | Immunoglobulin heavy constant gamma 4        | 10 | 1,2E-02 | 1,6 | 3,7E-01 | 1,1 | 2,3E-02 | 1,4 | 4,4E-01 | 1,1 |
| CRP_HUMAN   | C-reactive protein                           | 2  | 1,1E-02 | 2,1 | 5,7E-01 | 1,3 | 6,9E-02 | 1,6 | 7,7E-01 | 1,1 |
| PLMN_HUMAN  | Plasminogen                                  | 12 | 3,9E-03 | 0,4 | 1,8E-01 | 0,7 | 1,0E-01 | 0,8 | 5,8E-01 | 1,0 |
| SAA1_HUMAN  | Serum amyloid A-1 protein                    | 2  | 9,9E-01 | 1,0 | 3,4E-03 | 0,4 | 9,4E-02 | 0,6 | 7,2E-01 | 0,9 |
| FA5_HUMAN   | Coagulation factor V                         | 7  | 1,3E-02 | 0,7 | 1,9E-02 | 0,6 | 2,5E-01 | 0,9 | 2,2E-01 | 0,9 |
| C4BPA_HUMAN | C4b-binding protein alpha chain              | 10 | 2,2E-01 | 0,8 | 1,4E-01 | 0,7 | 4,7E-02 | 0,7 | 3,9E-01 | 0,9 |
| PROS_HUMAN  | Vitamin K-dependent protein S                | 5  | 2,4E-01 | 0,8 | 4,5E-02 | 0,6 | 2,8E-02 | 0,7 | 2,3E-01 | 0,8 |
| KV320_HUMAN | Immunoglobulin kappa variable 3-20           | 3  | 4,4E-02 | 0,8 | 2,2E-04 | 0,6 | 7,0E-03 | 0,7 | 1,3E-01 | 0,8 |
| KVD40_HUMAN | Immunoglobulin kappa variable 2D-40          | 2  | 1,5E-03 | 0,6 | 4,1E-03 | 0,5 | 1,7E-02 | 0,6 | 7,3E-04 | 0,7 |
| PKP1_HUMAN  | Plakophilin-1                                | 5  | 4,6E-03 | 0,6 | 2,3E-03 | 0,5 | 3,4E-02 | 0,6 | 2,8E-01 | 0,7 |
| IGKC_HUMAN  | Immunoglobulin kappa constant                | 6  | 4,5E-03 | 0,7 | 5,7E-04 | 0,6 | 8,1E-03 | 0,7 | 8,8E-04 | 0,6 |
| COMP_HUMAN  | Cartilage oligomeric matrix protein          | 2  | 9,9E-03 | 0,4 | 2,4E-03 | 0,4 | 2,9E-02 | 0,3 | 1,2E-01 | 0,6 |

|             |                                          |    |         |     |         |     |         |     |         |     |
|-------------|------------------------------------------|----|---------|-----|---------|-----|---------|-----|---------|-----|
| THRB_HUMAN  | Prothrombin                              | 16 | 1,3E-03 | 0,5 | 2,8E-05 | 0,4 | 3,4E-04 | 0,5 | 2,1E-03 | 0,6 |
| MASP2_HUMAN | Mannan-binding lectin serine protease 2  | 2  | 3,2E-03 | 0,4 | 7,4E-02 | 0,3 | 2,8E-01 | 0,5 | 2,0E-01 | 0,6 |
| IGHG2_HUMAN | Immunoglobulin heavy constant gamma 2    | 11 | 7,1E-02 | 0,7 | 3,2E-03 | 0,5 | 9,0E-02 | 0,7 | 1,4E-02 | 0,6 |
| APOC4_HUMAN | Apolipoprotein C-IV                      | 2  | 1,3E-02 | 0,4 | 3,7E-03 | 0,2 | 1,9E-02 | 0,4 | 3,6E-02 | 0,5 |
| KNG1_HUMAN  | Kininogen-1                              | 7  | 5,7E-04 | 0,4 | 1,0E-03 | 0,5 | 1,0E-06 | 0,5 | 2,7E-03 | 0,5 |
| KV127_HUMAN | Immunoglobulin kappa variable 1-27       | 2  | 2,1E-02 | 0,5 | 2,9E-03 | 0,4 | 8,4E-02 | 0,5 | 4,5E-03 | 0,5 |
| HV118_HUMAN | Immunoglobulin heavy variable 1-18       | 2  | 3,1E-03 | 0,7 | 8,3E-03 | 0,5 | 2,5E-01 | 0,9 | 3,4E-03 | 0,5 |
| IPSP_HUMAN  | Plasma serine protease inhibitor         | 3  | 1,9E-03 | 0,4 | 6,5E-02 | 0,3 | 6,5E-02 | 0,6 | 9,5E-02 | 0,5 |
| G3P_HUMAN   | Glyceraldehyde-3-phosphate dehydrogenase | 4  | 6,0E-05 | 0,2 | 3,2E-02 | 0,2 | 4,7E-04 | 0,2 | 7,6E-03 | 0,5 |
| APOE_HUMAN  | Apolipoprotein E                         | 10 | 7,0E-06 | 0,3 | 8,7E-05 | 0,3 | 1,3E-05 | 0,4 | 7,9E-04 | 0,5 |
| PCOC1_HUMAN | Procollagen C-endopeptidase enhancer 1   | 4  | 1,3E-02 | 0,5 | 5,0E-03 | 0,3 | 3,6E-02 | 0,6 | 1,8E-03 | 0,4 |
| KV106_HUMAN | Immunoglobulin kappa variable 1-6 O      | 2  | 1,5E-04 | 0,5 | 2,7E-03 | 0,4 | 2,2E-05 | 0,4 | 2,9E-04 | 0,4 |
| FHR5_HUMAN  | Complement factor H-related protein 5    | 3  | 1,5E-03 | 0,2 | 6,5E-05 | 0,2 | 5,6E-05 | 0,2 | 1,6E-03 | 0,3 |
| BLMH_HUMAN  | Bleomycin hydrolase                      | 4  | 8,9E-02 | 0,6 | 1,8E-01 | 0,5 | 5,1E-03 | 0,3 | 2,9E-02 | 0,3 |
| FA11_HUMAN  | Coagulation factor XI                    | 6  | 4,4E-02 | 0,4 | 1,2E-02 | 0,2 | 2,6E-02 | 0,3 | 5,9E-03 | 0,3 |
| PF4V_HUMAN  | Platelet factor 4 variant                | 2  | 8,1E-01 | 0,9 | 1,8E-01 | 0,6 | 4,2E-02 | 0,4 | 3,9E-02 | 0,3 |
| CXCL7_HUMAN | Platelet basic protein                   | 3  | 9,9E-01 | 1,0 | 9,3E-01 | 1,1 | 9,2E-01 | 1,1 | 1,1E-02 | 0,3 |
| VTNC_HUMAN  | Vitronectin                              | 7  | 2,7E-07 | 0,2 | 3,3E-05 | 0,2 | 3,8E-06 | 0,2 | 9,1E-06 | 0,2 |

|             |                                              |    |         |     |         |     |         |     |         |     |
|-------------|----------------------------------------------|----|---------|-----|---------|-----|---------|-----|---------|-----|
| KCRM_HUMAN  | Creatine kinase M-type                       | 3  | 9,5E-03 | 0,3 | 2,3E-04 | 0,1 | 5,7E-04 | 0,1 | 2,7E-02 | 0,2 |
| ANT3_HUMAN  | Antithrombin-III                             | 10 | 8,7E-05 | 0,2 | 5,6E-05 | 0,2 | 1,7E-04 | 0,2 | 4,7E-04 | 0,2 |
| FCN2_HUMAN  | Ficolin-2                                    | 2  | 1,4E-01 | 0,3 | 3,7E-05 | 0,1 | 1,2E-03 | 0,2 | 4,1E-06 | 0,2 |
| FA10_HUMAN  | Coagulation factor X                         | 3  | 1,4E-04 | 0,1 | 1,1E-04 | 0,1 | 5,3E-04 | 0,0 | 1,7E-05 | 0,1 |
| PLF4_HUMAN  | Platelet factor 4                            | 2  | 4,6E-03 | 0,1 | 1,6E-03 | 0,1 | 2,8E-03 | 0,1 | 2,0E-03 | 0,1 |
| IBP4_HUMAN  | Insulin-like growth factor-binding protein 4 | 2  | 2,1E-05 | 0,1 | 2,0E-05 | 0,1 | 6,4E-04 | 0,1 | 1,1E-02 | 0,1 |
| FA9_HUMAN   | Coagulation factor IX                        | 3  | 2,8E-04 | 0,1 | 2,2E-02 | 0,2 | 7,0E-04 | 0,1 | 3,7E-06 | 0,1 |
| PRG4_HUMAN  | Proteoglycan 4                               | 2  | 1,1E-04 | 0,0 | 6,0E-04 | 0,0 | 2,6E-04 | 0,0 | 1,1E-03 | 0,0 |
| FA12_HUMAN  | Coagulation factor XII                       | 2  | 2,1E-04 | 0,0 | 4,0E-03 | 0,1 | 1,1E-04 | 0,0 | 7,6E-04 | 0,0 |
| PROC_HUMAN  | Vitamin K-dependent protein C                | 5  | 1,1E-06 | 0,0 | 1,2E-05 | 0,0 | 9,3E-05 | 0,0 | 1,3E-04 | 0,0 |
| CBPB2_HUMAN | Carboxypeptidase B2                          | 3  | 2,6E-05 | 0,0 | 2,5E-05 | 0,0 | 4,8E-06 | 0,0 | 1,1E-04 | 0,0 |
