# Supplementary material for: The effect of calcium–magnesium mixtures in sol–gel coatings on bone tissue regeneration
Source: Royal Society of Chemistry journal article supplement (doi:10.1039/d2bm00742h), 2022-01-01
Supplement: d2bm00742h4.pdf [file d2bm00742h4.pdf]

**Supplementary Table 3.** Progenesis comparative analysis between the proteins identified onto the CaMg materials with respect to the Ca coatings. Proteins with ANOVA  $p < 0.05$  (yellow) and a ratio higher than 1.5 in either direction were considered as significantly different. Proteins with increased affinity to coatings doped with CaMg in comparison to Ca are marked in red, while those with reduced affinity appear in green.

| Accession   | Description                                   | Peptides | <i>p</i> value | Ca0.5Mg/Ca | <i>p</i> value | Ca1Mg/Ca | <i>p</i> value | Ca1.5Mg/Ca |
|-------------|-----------------------------------------------|----------|----------------|------------|----------------|----------|----------------|------------|
| HRG_HUMAN   | Histidine-rich glycoprotein                   | 5        | 2,65E-04       | 4,24       | 8,25E-06       | 6,31     | 1,87E-05       | 10,64      |
| PIP_HUMAN   | Prolactin-inducible protein                   | 2        | 7,04E-01       | 1,49       | 5,94E-01       | 1,31     | 2,02E-02       | 3,34       |
| PLAK_HUMAN  | Junction plakoglobin                          | 5        | 2,85E-01       | 2,46       | 3,52E-02       | 0,38     | 8,77E-02       | 3,18       |
| SPB12_HUMAN | Serpin B12                                    | 4        | 5,59E-01       | 1,49       | 5,58E-01       | 1,35     | 2,47E-02       | 3,14       |
| G3P_HUMAN   | Glyceraldehyde-3-phosphate dehydrogenase      | 4        | 4,13E-01       | 1,60       | 2,35E-01       | 1,45     | 4,39E-03       | 3,14       |
| PLMN_HUMAN  | Plasminogen                                   | 12       | 9,60E-02       | 1,66       | 5,57E-02       | 1,69     | 3,41E-03       | 2,30       |
| HBA_HUMAN   | Hemoglobin subunit alpha                      | 4        | 1,88E-01       | 0,71       | 3,25E-01       | 1,31     | 3,33E-02       | 1,81       |
| APMAP_HUMAN | Adipocyte plasma membrane-associated protein  | 2        | 3,48E-02       | 0,53       | 1,83E-01       | 1,41     | 3,55E-01       | 1,67       |
| APOA4_HUMAN | Apolipoprotein A-IV                           | 7        | 5,47E-01       | 0,90       | 3,48E-01       | 1,21     | 2,09E-02       | 1,55       |
| FA12_HUMAN  | Coagulation factor XII                        | 2        | 1,27E-01       | 2,38       | 3,21E-02       | 0,29     | 3,51E-01       | 1,48       |
| HV551_HUMAN | Immunoglobulin heavy variable 5-51            | 2        | 5,37E-03       | 0,66       | 1,44E-01       | 1,37     | 9,91E-01       | 1,00       |
| TGM3_HUMAN  | Protein-glutamine gamma-glutamyltransferase E | 4        | 1,19E-02       | 0,56       | 1,04E-02       | 0,60     | 9,81E-01       | 0,99       |
| KCRM_HUMAN  | Creatine kinase M-type                        | 3        | 1,12E-01       | 0,45       | 3,55E-02       | 0,23     | 8,44E-01       | 0,88       |
| CO8B_HUMAN  | Complement component C8 beta chain            | 3        | 1,03E-02       | 0,43       | 8,84E-01       | 0,96     | 1,74E-01       | 0,78       |
| TSK_HUMAN   | Tsukushin                                     | 2        | 7,59E-03       | 0,28       | 1,60E-03       | 0,41     | 2,99E-01       | 0,60       |
| BLMH_HUMAN  | Bleomycin hydrolase                           | 4        | 7,53E-01       | 0,89       | 6,09E-03       | 0,47     | 1,10E-01       | 0,54       |
| CRP_HUMAN   | C-reactive protein                            | 2        | 1,96E-01       | 0,60       | 2,01E-01       | 0,78     | 3,38E-03       | 0,51       |
