# Supplementary figures and images for: The effect of calcium–magnesium mixtures in sol–gel coatings on bone tissue regeneration
Source: Royal Society of Chemistry journal article supplement (doi:10.1039/d2bm00742h), 2022-01-01

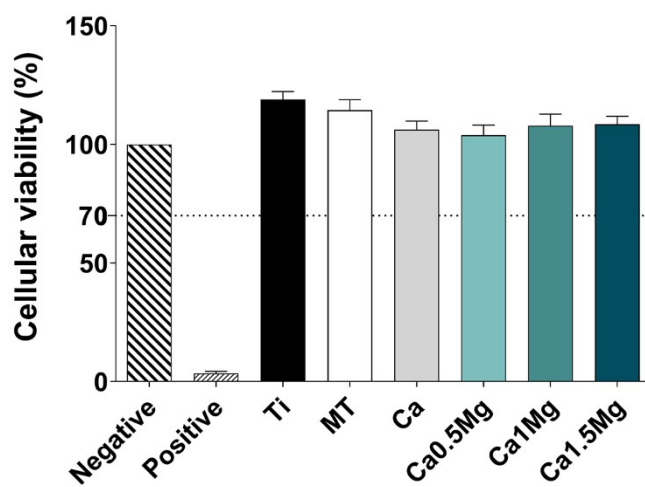

**Supplementary Figure 1.** Citotoxicity of the CaMg sol-gel coatings.

Supplement: d2bm00742h1.pdf [file d2bm00742h1.pdf]
